# Supplementary material
Source: MDPI journal article supplement (https://www.mdpi.com/2076-3417/13/14/8539)
Supplement: s1 [file s1]

```
#####
# INSTITUTE TECHNOLOGY OF BANDUNG #
# School of Architecture, Planning, and Policy Development #
# Research on HBW Trip Production Modeling by #
# Doctoral Student: Rempu Sora Rayat #
# Script Name: Splitter #
# Purpose: To read list of usernames file (xlsx format) #
# Programmer: Richard Shiawase #
#####
```

```
from openpyxl import load_workbook
```

```
class Splitter():
    nameDictionary = {}
    wb_name = ""

    def setNamaFile(self, nama):
        self.wb_name = nama

    def getNameCountList(self):
        return len(self.nameDictionary)

    def getAllNameFromSheet(self):
        print("Getting all jml titik")
        # wb_name = "username.xlsx" # file name
        wb_username = load_workbook(self.wb_name, data_only=True)
        self.sheet_obj = wb_username['Username'] # worksheet name

        print("Getting all name for sheet")
        for cx in range(2, self.sheet_obj.max_row + 1):
            # excel object
            cell_obj_username = self.sheet_obj.cell(row=cx, column=1)
            self.nameDictionary[cell_obj_username.value.strip().lower()] =
cx
            # print("Nama "+cell_obj_username.value.strip().lower())

        wb_username.close()

        return self.nameDictionary

    def getAllDescription(self, plusCodeWithDescription):
        print("Getting all description")
        wb_name2 = "identifikasi.xlsx" # file name 2
        wb_identifikasi = load_workbook(wb_name2, data_only=True)
        sheet_obj_deskripsi = wb_identifikasi['identifikasi']
        plusCodeDict = {}

        for x in range(2, sheet_obj_deskripsi.max_row + 1):
            cell_obj_plus_code = sheet_obj_deskripsi.cell(row=x, column=1)
            cell_obj_plus_code_deskripsi =
sheet_obj_deskripsi.cell(row=x, column=3)
            plusCodeDict[cell_obj_plus_code.value] =
cell_obj_plus_code_deskripsi.value

        wb_identifikasi.close()

        plusCodeWithDescription.setDictionary(plusCodeDict)
```
