# Supplementary material
Source: MDPI journal article supplement (https://www.mdpi.com/2076-3417/13/14/8539)
Supplement: s1 [file s1]

```
#####
# INSTITUTE TECHNOLOGY OF BANDUNG #
# School of Architecture, Planning, and Policy Development #
# Research on HBW Trip Production Modeling by #
# Doctoral Student: Rempu Sora Rayat #
# Script Name: Sheet #
# Purpose: To read list of usernames file (xlsx format) #
# Programmer: Richard Shiawase #
#####
```

```
import openpyxl

from openpyxl import Workbook

from openpyxl.styles import Alignment

from PlusCodeDescriptionResume import PlusCodeDescriptionResume

class Sheet():

    wb_new = Workbook()

    def __init__(self, Row, listProfile, Column):

        self.row = Row

        self.listProfile = listProfile

        self.column = Column

    def create_header(self, sheet, profile):

        # data header

        i = 1

        self.column.createColumnHeader(profile)

        for key, value in self.column.dictHeader.items():

            # print(header)

            sheet.cell(row=1, column=i).value = key

            sheet.cell(row=2, column=i).value = value

            i += 1

        sheet.merge_cells(start_row=1, start_column=1, end_row=2, end_column=1)

        sheet.merge_cells(start_row=1, start_column=2, end_row=2, end_column=2)

        sheet.merge_cells(start_row=1, start_column=3, end_row=2, end_column=3)
```

```

def insert_row_with_value(self, sheet, profile):

    cx = 3 #init row

    self.newDict = {}

    self.sorted_interval = dict(sorted(profile.sorted_interval.items()))

    for keyInterval, intervalObj in self.sorted_interval.items():

        rowDeficit = (len(intervalObj.getPlusGroupCode())+1) - len(intervalObj.creds)

        newIntervalToLoop = True # every new interval set to True

        if cx != 3:

            cx += 1 #nambahin row setelah interval pertama biar ga mepet


        row = cx # Match with pluscodegroup Row every new interval
        for cred in intervalObj.creds:

            column = 1

            sheet.cell(row=cx, column=1).value = profile.username

            sheet.cell(row=cx, column=2).value = cred.time

            sheet.cell(row=cx, column=3).value = cred.plusCode

            self.previousTimeSplitter = 0


        # injecting column header in profile

        self.column.createColumnHeader(profile)


        # column will expand wider as long as plus code group size in profile attribute

        for key, value in self.column.dictHeader.items():

            if cred.plusCode == key and column > 3:

                sheet.cell(row = cx, column = column).value = cred.sebaran


            elif cred.plusCode != key and column > 3 and column < profile.getPlusCodeGroupSize()+4:

                sheet.cell(row = cx, column = column).value = 0

```

```
#kolom sebaran
```

```
elif column == profile.getPlusCodeGroupSize()+4:
```

```
    sheet.cell(row = cx, column = column).value = cred.sebaran
```

```
#kolom interval
```

```
elif column == profile.getPlusCodeGroupSize()+5:
```

```
    if self.newProfile:
```

```
        sheet.cell(row = cx, column = column).value = "i = "+cred.interval
```

```
    column += 1
```

```
cx+=1
```

```
if (rowDeficit > 0): # Ketika butuh penyetaraan baris pada baris selanjutnya akan dibebankan
```

```
    cx += rowDeficit
```

```
    print("Row deficit 1adalah " + str(row))
```

```
if newIntervalToLoop is True:
```

```
    # column will expand wider as long as plus code group size in profile attribute
```

```
    idx = 1
```

```
    for key,val in intervalObj.getPlusGroupCode().items():
```

```
        print("tes")
```

```
        column=1
```

```
        totalSebaran = 0
```

```
        probability = 0
```

```
        pluscodeResumeObj = PlusCodeDescriptionResume(val.getDescription())
```

```
        val.setId(keyInterval)
```

```
        for key, value in self.column.dictHeader.items():
```

```

0         if column== profile.getPlusCodeGroupSize()+6: #if shifting columns equal to index +6 from

            sheet.cell(row=row, column=column).value = idx # kemungkinan lokasi index

elif column == profile.getPlusCodeGroupSize() + 7: # if shifting columns equal to index +7
from 0

    for credo in intervalObj.creds:

        if idx == credo.sebaran: #if idx == sebaran then calculate
            totalSebaran+=1

        sheet.cell(row=row, column=column).value = totalSebaran

        pluscodeResumeObj.setTotalSebaran(totalSebaran)

    sheet.cell(row=row+1, column=column).value = intervalObj.getTotalFreq()

    print("row ke berapa "+str(row+1)+" "+str(intervalObj.getTotalFreq()))

elif column == profile.getPlusCodeGroupSize() + 8: # if shifting columns equal to index +7
from 0

    # totalSebaran = 0

    for credo in intervalObj.creds:

        probability = pluscodeResumeObj.getTotalSebaran()/intervalObj.getTotalFreq()

        sheet.cell(row=row, column=column).value = probability

    pluscodeResumeObj.setProbability(probability)

    if val.getId() == keyInterval:

        val.setProbability(str(keyInterval) + " " + str(probability))

        print("Val added to " + str(keyInterval) + " with probability" + str(
            val.getProbability()) + " and key" + str(key) + " " + str(val.getId()))

    column+=1 #shifting columns to the right

```

```

        # self.newDict[str(keyInterval)+"_"+str(keye)]=val

        up_dict = {keye: pluscodeResumeObj}
        intervalObj.getPlusGroupCode().update(up_dict)

        print("Intervalee "+profile.username+" " + str(keyInterval) + " memiliki " + keye + " " +
str(pluscodeResumeObj.getProbability()))+" ")

        idx+=1

        row+=1

        up_dict = {keyInterval: intervalObj}
        self.sorted_interval.update(up_dict)

cols=1
row=3

self.column.createColumnHeader(profile)
# sorted_interval2 = dict(sorted(profile.sorted_interval.items()))

for key, value in self.column.dictHeader.items():
    if cols == profile.getPlusCodeGroupSize() + 9: # if shifting columns equal to index +9 from 0
        for keyInterval, intervalObj in self.sorted_interval.items():
            sheet.cell(row=row, column=cols).value = keyInterval # kemungkinan lokasi index

            row+=1

        row = 3

    elif cols == profile.getPlusCodeGroupSize() + 10: # if shifting columns equal to index +9 from 0
        # for k,v in profile.getPlusCodeGroup().items():
        for keyIntervale, intervalObj in self.sorted_interval.items():
            cola = cols

            mayaDict = intervalObj.getPlusGroupCode()

            # print(mayaDict['0_6P58R5FW+HG'].getProbability())

            for keyb, vals in intervalObj.getPlusGroupCode().items():

```

```

        # if k == key:

        desk = sheet.cell(row=1, column=cola).value

        print("Tesssss pendahuluan C "+str(keyb)+" "+str(keyIntervale)+" "+"
"+str(vals.getProbability()))+" "+profile.username)

        #

        sheet.cell(row=row, column=cola).value = vals.getProbability() # kemungkinan lokasi index

        cola+=1

        row+=1

    cols+=1

    # sheet.auto_filter.add_sort_condition('B:B',True)

def create_sheet(self):
    for profile in self.listProfile:
        self.newProfile = True
        username = profile.username
        profile.mappingCredsToInterval()
        profile.getMappingCredsInterval()
        self.wb_new.create_sheet(username)
        sheet = self.wb_new[username]
        self.create_header(sheet, profile)
        self.insert_row_with_value(sheet,profile)

    # save data

    self.wb_new.save('template5.xlsx')

```

```

def update_sheet(wb2, profile):
    username1 = profile.username
    sheet = wb2[username1]
    # init dictionary
    groupedPlusCodeDictionary = {}
    colForPlusCodeKey = 1
    colForPlusCode = 4
    cx = 2
    cx2 = 2
    for Time, PlusCode in zip(profile.listTime, profile.listPlusCode):
        try:
            sheet.cell(row=cx, column=1).value = username1
            sheet.cell(row=cx, column=2).value = Time.getTime()
            sheet.cell(row=cx, column=3).value = PlusCode.getPlusCode()

            if search(groupedPlusCodeDictionary, PlusCode.getPlusCode()) is None:
                groupedPlusCodeDictionary[str(colForPlusCodeKey)] = PlusCode.getPlusCode()
                colForPlusCodeKey += 1

            cx += 1
        except Exception as e:
            print(e)

    for x in groupedPlusCodeDictionary:
        try:
            sheet.cell(row=1, column=colForPlusCode).value = groupedPlusCodeDictionary[x]
            colForPlusCode += 1
        except Exception as e:
            print(e)

```

```
# update isi kolom

colForPlusCode = 3

for PlusCode in profile.listPlusCode:

    plusCode = PlusCode.getPlusCode()

    for x in groupedPlusCodeDictionary:

        if (plusCode == groupedPlusCodeDictionary[x]):

            sheet.cell(row=cx2, column=colForPlusCode + int(x)).value = x

            sheet.cell(row=cx2, column=colForPlusCode + int(x)).alignment =
Alignment(horizontal='right')

        else:

            sheet.cell(row=cx2, column=colForPlusCode + int(x)).value = 0

            sheet.cell(row=cx2, column=colForPlusCode + int(x)).alignment =
Alignment(horizontal='right')

    cx2 += 1

del profile
```
