# Supplementary material
Source: MDPI journal article supplement (https://www.mdpi.com/2076-3417/13/14/8539)
Supplement: s1 [file s1]

```
#####  
# INSTITUTE TECHNOLOGY OF BANDUNG #  
# School of Architecture, Planning, and Policy Development #  
# Research on HBW Trip Production Modeling by #  
# Doctoral Student: Rempu Sora Rayat #  
# Script Name: Row #  
# Purpose: To read profile #  
# Programmer: Richard Shiawase #  
#####
```

Interval

```
from Profile import Profile
```

```
# from Creds import Creds
```

```
class Row():
```

```
    def getAllProfileListFromRow(self, splitter):  
        print("Getting all profile list from excel..")  
        profileList = []  
        for key, value in splitter.nameDictionary.items():  
            profile = Profile(key)  
            profileList.append(profile)  
        return profileList
```
