# Supplementary material
Source: MDPI journal article supplement (https://www.mdpi.com/2076-3417/13/14/8539)
Supplement: s1 [file s1]

```
#####
# INSTITUTE TECHNOLOGY OF BANDUNG #
# School of Architecture, Planning, and Policy Development #
# Research on HBW Trip Production Modeling by #
# Doctoral Student: Rempu Sora Rayat #
# Script Name: Column #
# Purpose: To read profile #
# Programmer: Richard Shiawase #
#####
```

```
class Column():
    headerList = []
    dictHeader = {}

    def createColumnHeader(self, profile):
        self.dictHeader.clear()
        self.dictHeader["Name"] = ""
        self.dictHeader["Created At"] = ""
        self.dictHeader["Profile Url"] = ""

        self.dictHeader["Latitude"] = ""
        self.dictHeader["Longitude"] = ""
        self.dictHeader["Google Maps"] = ""
        self.dictHeader["Tweet"] = ""

    def getColumnHeader(self):
        return self.headerList
```
